# Supplementary material for: From 1D to 2D: dopamine constructed 2D NiCo-hydroxide nanosheets/graphene composites for high-performance supercapacitors
Source: Royal Society of Chemistry journal article supplement (doi:10.1039/d1se00243k), 2021-01-01
Supplement: d1se00243k1.pdf [file d1se00243k1.pdf]

# **From 1D to 2D: Dopamine constructing 2D NiCo-hydroxide nanosheets/graphene composite for high-performance supercapacitors**

*Xu Zhang<sup>a\*</sup>, Shixuan Yang<sup>a</sup>, Yuhan Tian<sup>a</sup>, Anmin Liu<sup>a</sup>, Wang Lu<sup>a</sup>, Ning Qu<sup>a</sup>, Minggang Guo<sup>b</sup> and Panpan Mi<sup>b</sup>*

<sup>a</sup> State Key Laboratory of Fine Chemicals, Dalian University of Technology, Dalian 116023, China. School of Chemical Engineering, Dalian University of Technology, Panjin 124221, Liaoning, China.

<sup>b</sup> Panjin Institute of Industrial Technology, Liaoning Key Laboratory of Chemical Additive Synthesis and Separation, Dalian University of Technology, Panjin 124221, Liaoning, China

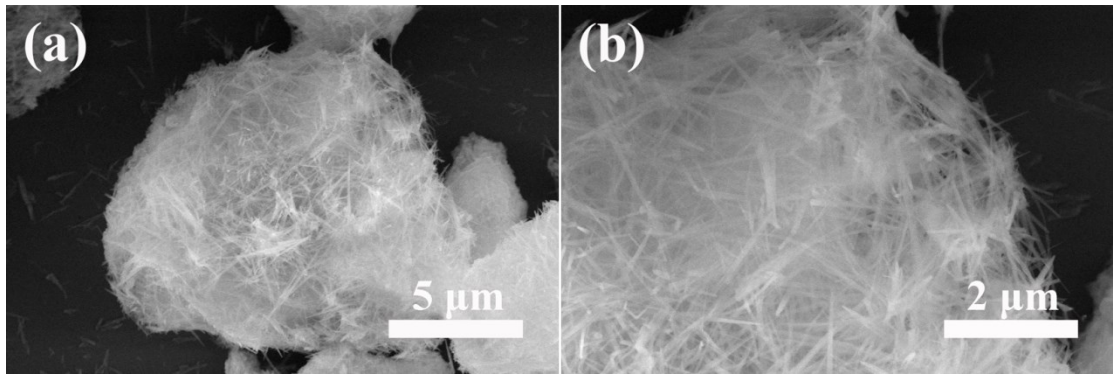

**Fig. 1.** SEM images of the as-made NiCo-OH nanowires

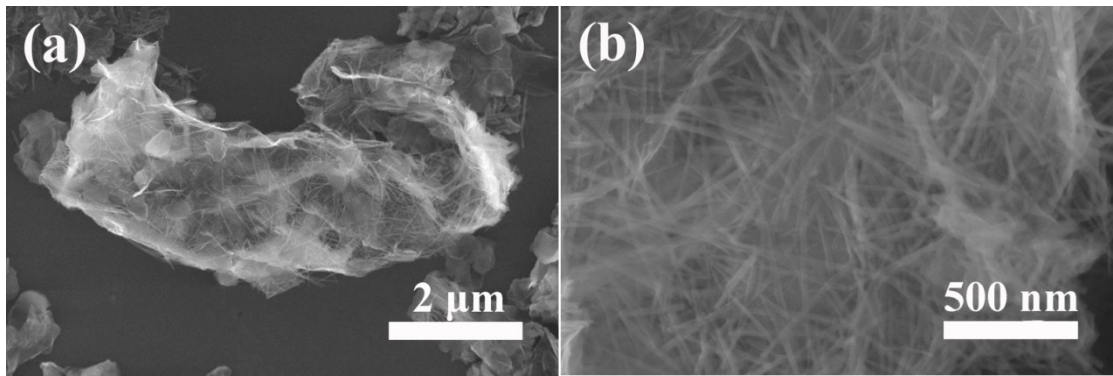

**Fig. 2.** SEM images of the as-made NiCo-OH/G

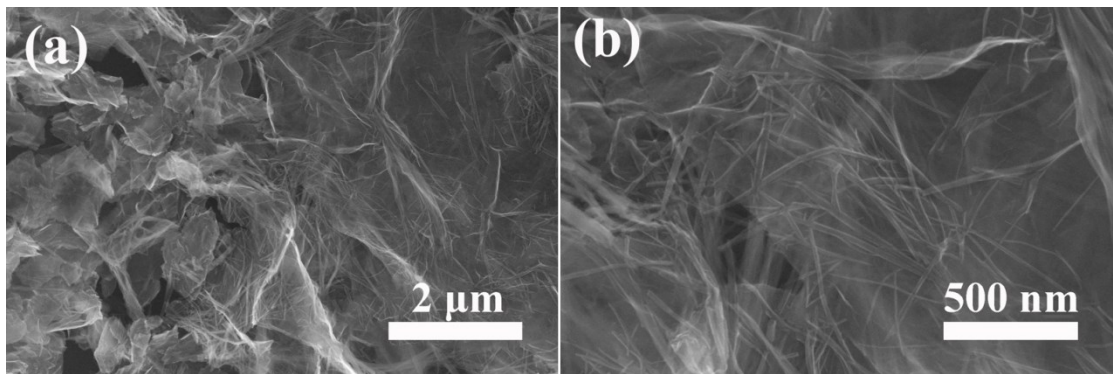

**Fig. 3.** SEM images of the as-made NiCo-OH/G@PDA-1

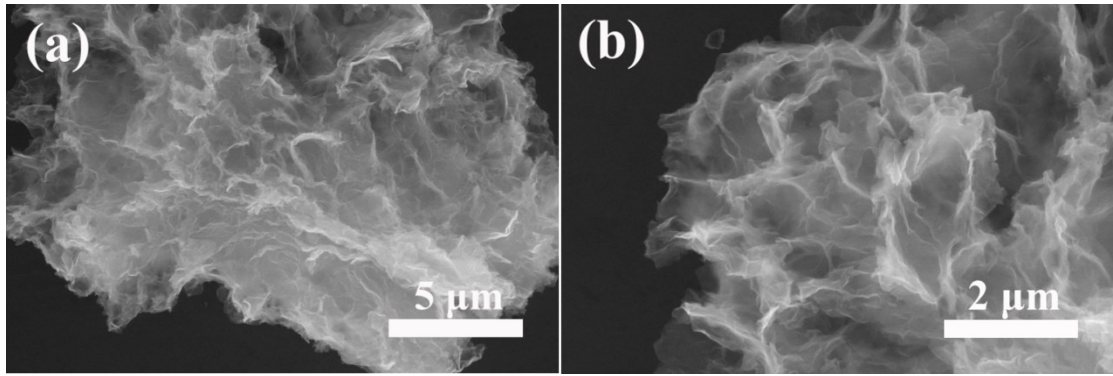

**Fig. 4.** SEM images of the as-made NiCo-OH/G@PDA-2

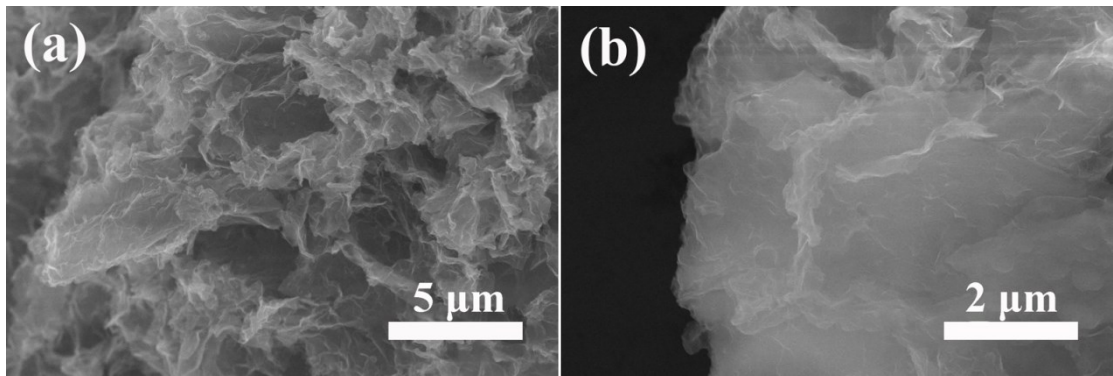

**Fig. 5.** SEM images of the as-made NiCo-OH/G@PDA-3

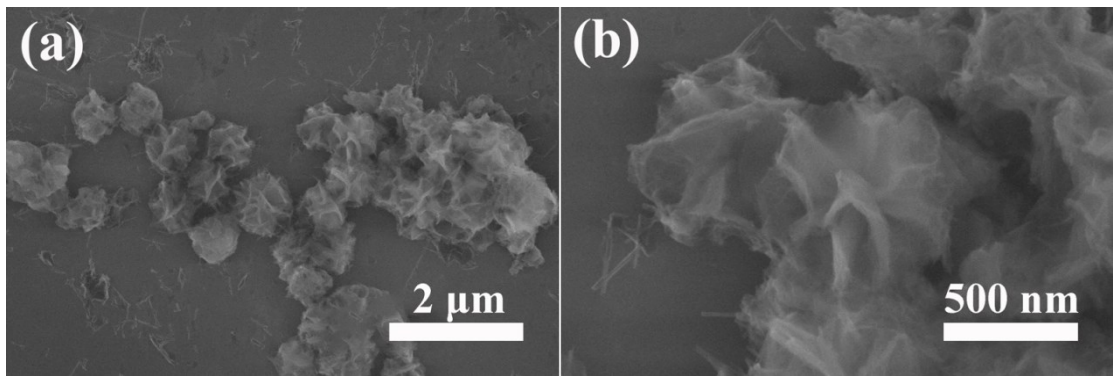

**Fig. 6.** SEM images of the as-made NiCo-OH@PDA

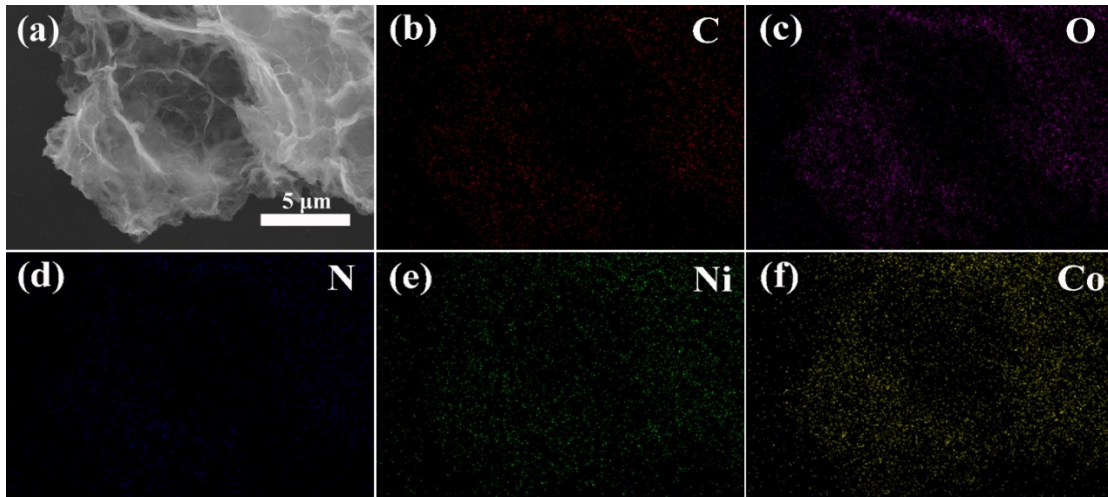

**Fig. S7.** SEM image of the (a) NiCo-OH/G@PDA-2 and (b-f) the corresponding elemental mapping images of C, O, N, Ni, Co from the image.

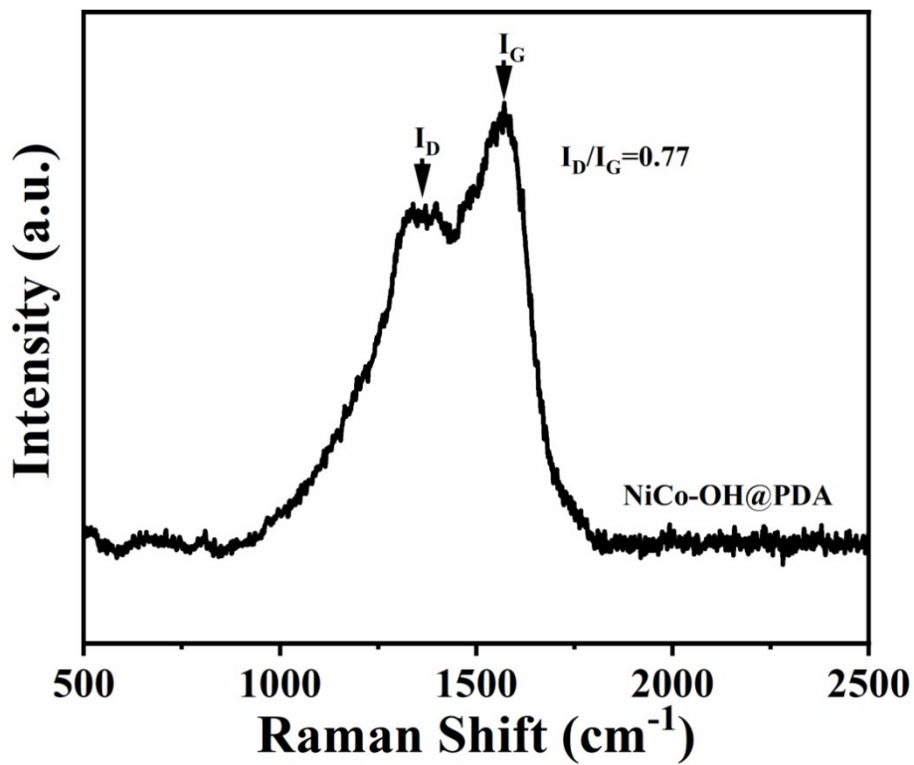

**Fig. S8.** Raman spectrum of the as-made NiCo-OH@PDA.

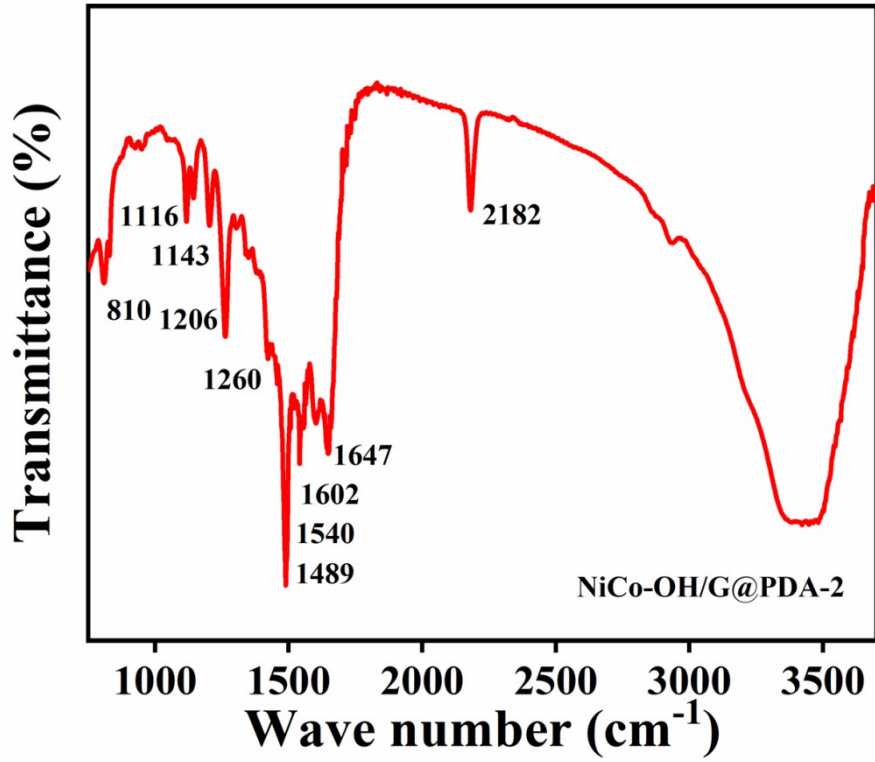

Fig. S9. FT-IR spectra of the as-made NiCo-OH/G@PDA-2.

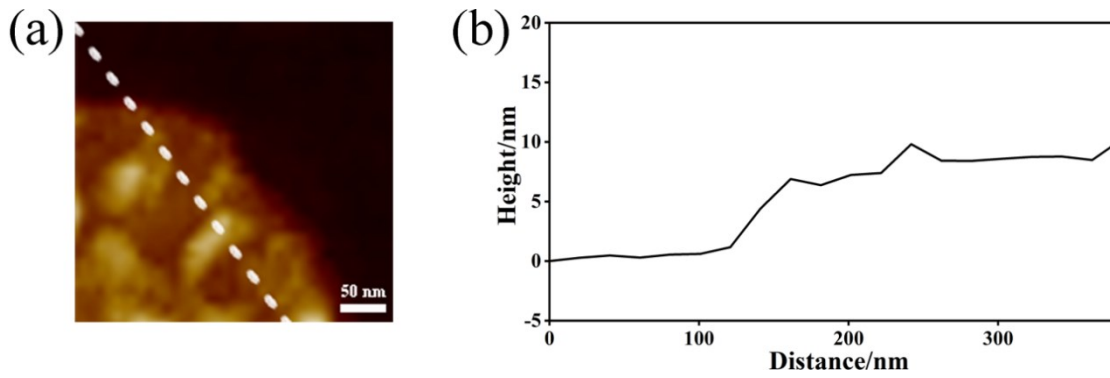

Fig. S10. AFM images and corresponding height image of NiCo-OH/G@PDA-2.

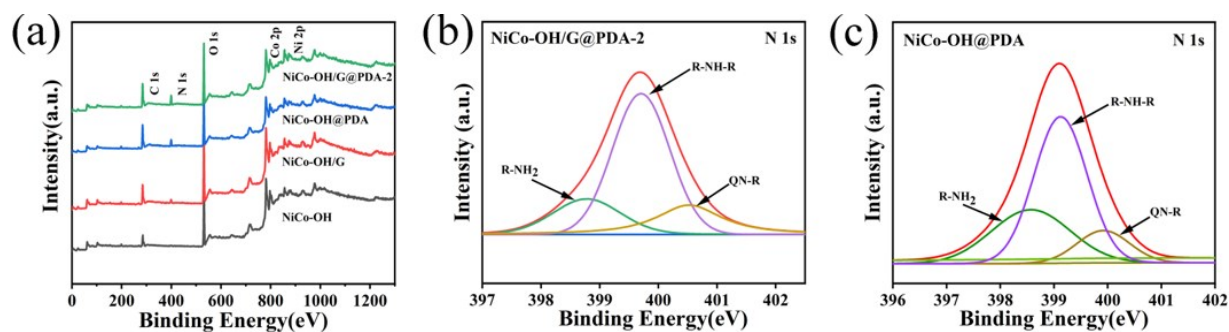

**Fig. S11.** (a) XPS survey of the NiCo-OH, NiCo-OH/G, NiCo-OH@PDA and NiCo-OH/G@PDA-2. High-resolution XPS N 1s spectra of the (b) NiCo-OH/G@PDA-2; (c) NiCo-OH@PDA.

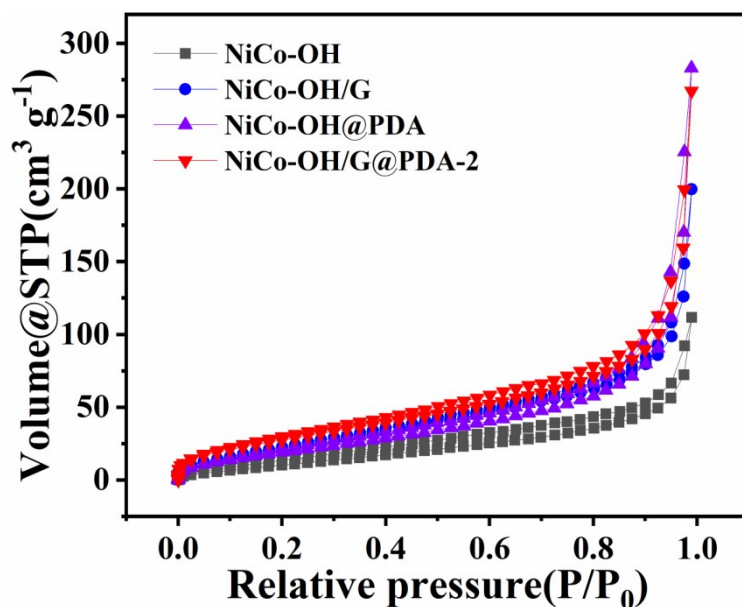

**Fig. S12.** Nitrogen adsorption-desorption isotherms of NiCo-OH, NiCo-OH/G, NiCo-OH@PDA and NiCo-OH/G@PDA-2

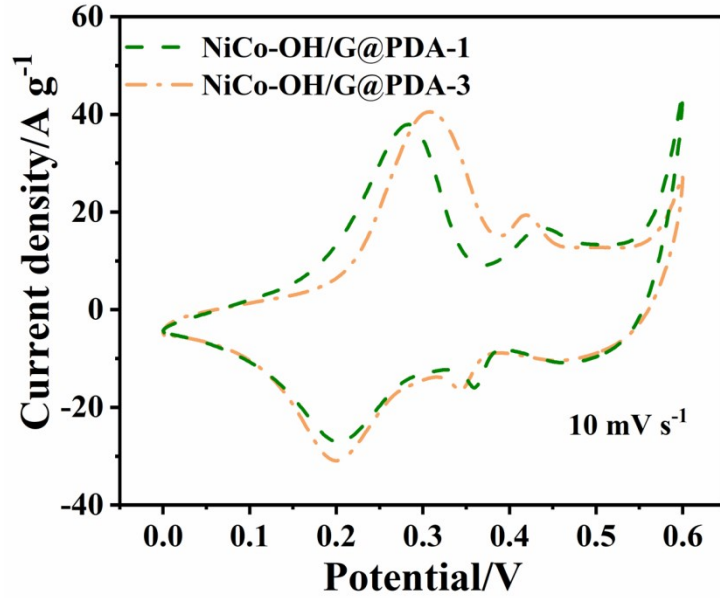

**Fig. S13.** CV curves of NiCo-OH/G@PDA-1 and NiCo-OH/G@PDA-3 at scan rates of 10 mV s<sup>-1</sup>

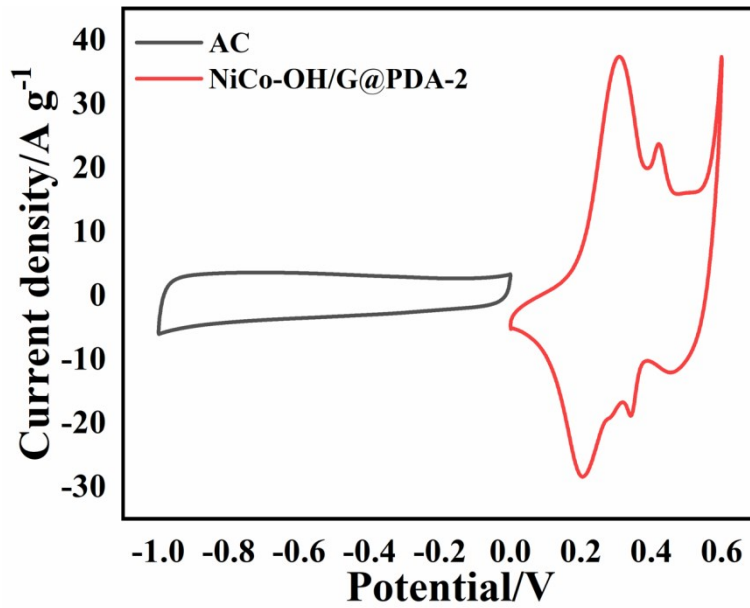

**Fig. S14.** CV curves of NiCo-OH/G@PDA-2 and active carbon electrodes tested at a scan rate of 10 mV s<sup>-1</sup>.

**Table S1.** Capacitances of the representative transition metal-based electrodes

| NO. | Sample                                     | Current density(A g <sup>-1</sup> ) | Specific capacitance (F g <sup>-1</sup> ) | Rate capability             | Reference |
|-----|--------------------------------------------|-------------------------------------|-------------------------------------------|-----------------------------|-----------|
| 1   | NiCo-OH/G@PDA-2                            | 1                                   | 1520                                      | 68% at 50 A g <sup>-1</sup> | This work |
| 2   | NiCoP@NiCoP                                | 1                                   | 1492.5                                    | 69% at 15 A g <sup>-1</sup> | [1]       |
| 3   | flower-on-sheet NiCo LDH                   | 1                                   | 1187.2                                    | 71% at 30 A g <sup>-1</sup> | [2]       |
| 4   | Co-MOF@CoNiO <sub>2</sub> /CC              | 1                                   | 571                                       | 86% at 20 A g <sup>-1</sup> | [3]       |
| 5   | KCu <sub>7</sub> S <sub>4</sub> @NiMn LDHs | 1                                   | 733.8                                     | 77% at 30 A g <sup>-1</sup> | [4]       |
| 6   | CoAl LDH@CF                                | 1                                   | 634.3                                     | 67% at 10 A g <sup>-1</sup> | [5]       |
| 7   | NiCu(OH) <sub>2</sub> CO <sub>3</sub>      | 1                                   | 971                                       | 70% at 10 A g <sup>-1</sup> | [6]       |
| 8   | CoAl(DS <sup>-</sup> )-LDHs                | 1                                   | 1481.7                                    | 58% at 32 A g <sup>-1</sup> | [7]       |
| 9   | MgAl-LDH-GO                                | 1                                   | 1208.5                                    | 56% at 10 A g <sup>-1</sup> | [8]       |
| 10  | ring-like CoAlNi LDH                       | 1                                   | 1339.6                                    | 56% at 10 A g <sup>-1</sup> | [9]       |

## Reference

- [1]. Q. Liu, R. Hu, J. Qi, Y. Sui, Y. He, Q. Meng, F. Wei and Y. Ren, *J. Mater. Sci.*, 2020, **55**, 1157-1169.
- [2]. Y. Zhou, J. Li, Y. Yang, B. Luo, X. Zhang, E. Fong, W. Chu and K. Huang, *J Alloys Compd.*, 2019, **788**, 1029-1036.
- [3]. L. Wang, D. Jia, L. Yue, K. Zheng, A. Zhang, Q. Jia and J. Liu, *ACS Appl. Mater. Interfaces.*, 2020, **12**, 47526-47538.
- [4]. X. L. Guo, J. M. Zhang, W. N. Xu, C. G. Hu, L. Sun and Y. X. Zhang, *J. Mater. Chem. A.*, 2017, **5**, 20579-20587.
- [5]. A. D. Jagadale, G. Guan, X. Li, X. Du, X. Ma, X. Hao and A. Abudula, *Energy Technol.*, 2016, **4**, 997-1004.
- [6]. X. Zheng, Y. Ye, Q. Yang, B. Geng and X. Zhang, *Chem. Eng. J.*, 2016, **290**, 353-360.
- [7]. Y. Xiao, D. Su, X. Wang, S. Wu, L. Zhou, S. Fang and F. Li, *Sci. China Mater.*, 2018, **61**, 263-272.
- [8]. Y. Gao, Z. Wei and J. Xu, *Electrochim. Acta.*, 2020, **330**, 135195.
- [9]. H. Chen, H. Zhang, Y. Zhang, Y. Wang, X. Su, L. Zhang and Z. Lin, *Chem. Eng. J.*, 2019, **375**, 121926.
